# Supplementary material
Source: publisher site journal article supplement (https://www.dovepress.com/article/176067)
Supplement: Supplementary file 4 [file get_supplementary_file.php]

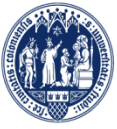

## Preferences in periodontal disease

Dear Patient,

Thank you for your interest in this study. You were asked to participate since you as a patient are best able to evaluate the importance and impact of different aspects of your disease and its therapy. Your opinion on disease and treatment characteristics helps us to further improve your health care. Participation in this study is voluntary. The ethical committee of the University Hospital Cologne agreed on this study. The questionnaire is anonymous, which means that your answers to the questions are not combined with your personal data.

As shown in the example, in each questions you will see two disease and treatment situations. Please mark the one you regard as more preferable. Even though some combinations might seem illogical or not desirable try to choose the option that most likely fits your preferences.

**Example:** Here the patient prefers situation A over situation B.

| Please assume:<br>Without treatment you will loose 3 teeth within the next 10 years.<br>With treatment you can reach one of the following situations. |               |                         |
|-------------------------------------------------------------------------------------------------------------------------------------------------------|---------------|-------------------------|
|                                                                                                                                                       | Situation A   | Situation B             |
| <b>Tooth loss within next 10 years</b>                                                                                                                | 1 tooth lost  | no tooth lost           |
| <b>Own costs for treatment, follow-up care and re-treatment</b>                                                                                       | 0 €per year   | 500 €per year           |
| <b>Complaints &amp; symptoms</b>                                                                                                                      | no complaints | occasional gum bleeding |
| <b>Frequency of periodontist visits</b>                                                                                                               | no necessary  | 4 x per year            |
| <b>Which situation do you prefer?<br/>(please tick a box):</b>                                                                                        | <b>X</b>      |                         |

→ The aspects of periodontal disease and its treatment will be explained on the following page in more detail.

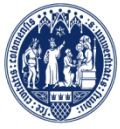

**Tooth loss within next 10 years:**

Studies showed that patients with periodontal disease lose approximately 3 teeth during a time span of 10 years if their disease is left untreated. With treatment, all or some of these teeth may be saved. The treatment includes removal of plaque and calculus around the teeth and between gum and tooth necks as well as polishing of teeth.

**Own costs for treatment, follow-up care and re-treatment:**

These include all costs, which you have to pay out of pocket annually. It includes costs for treatment, follow-up care and re-treatment (i.e., any cost that is not covered by your health insurance).

**Symptoms & Complaints:**

These refer to symptoms and complaints that can occur when suffering from periodontal disease: sensitive tooth neck, occasional gum bleeding or long teeth due to gum recession (i.e. teeth appear longer than they are).

**Frequency of periodontist visits:**

This refers to the number of visits that are necessary for follow-up and re-treatment.

**Thank you for participating in this study!**

**In case of questions please contact us:**

**Marion Danner**  
Tel. 0221 4679 -132  
marion.danner@uk-koeln.de

**Vera Venedey**  
Tel. 0221 4679 -133  
vera.venedey@uk-koeln.de

**Institut für Gesundheitsökonomie und Klinische Epidemiologie (IGKE)**  
Gleueler Strasse 176-178  
50935 Köln

**Question 1**

| Please assume:<br>Without treatment, you will loose 3 teeth within the next 10 years.<br>With treatment you can reach one of the following situations. |                    |                         |
|--------------------------------------------------------------------------------------------------------------------------------------------------------|--------------------|-------------------------|
|                                                                                                                                                        | <b>Situation A</b> | <b>Situation B</b>      |
| <b>Tooth loss within next 10 years</b>                                                                                                                 | 1 tooth lost       | no tooth lost           |
| <b>Own costs for treatment, follow-up care and re-treatment</b>                                                                                        | 100 €per year      | 100 €per year           |
| <b>Complaints &amp; symptoms</b>                                                                                                                       | no complaints      | occasional gum bleeding |
| <b>Frequency of periodontist visits</b>                                                                                                                | none necessary     | 2 x per year            |
| <b>Which situation do you prefer?<br/>(please tick a box):</b>                                                                                         |                    |                         |

**Question 2**

| Please assume:<br>Without treatment you will loose 3 teeth within the next 10 years.<br>With treatment you can reach one of the following situations. |                         |                                 |
|-------------------------------------------------------------------------------------------------------------------------------------------------------|-------------------------|---------------------------------|
|                                                                                                                                                       | <b>Situation A</b>      | <b>Situation B</b>              |
| <b>Tooth loss within next 10 years</b>                                                                                                                | 2 teeth lost            | 1 tooth lost                    |
| <b>Own costs for treatment, follow-up care and re-treatment</b>                                                                                       | 0 €per year             | 500 €per year                   |
| <b>Complaints &amp; symptoms</b>                                                                                                                      | occasional gum bleeding | long teeth due to gum recession |
| <b>Frequency of periodontist visits</b>                                                                                                               | none necessary          | 4 x per year                    |
| <b>Which situation do you prefer?<br/>(please tick a box):</b>                                                                                        |                         |                                 |

**Question 3**

| Please assume:<br>Without treatment you will loose 3 teeth within the next 10 years.<br>With treatment you can reach one of the following situations. |                    |                      |
|-------------------------------------------------------------------------------------------------------------------------------------------------------|--------------------|----------------------|
|                                                                                                                                                       | <b>Situation A</b> | <b>Situation B</b>   |
| <b>Tooth loss within next 10 years</b>                                                                                                                | no tooth lost      | 2 teeth lost         |
| <b>Own costs for treatment, follow-up care and re-treatment</b>                                                                                       | 300 €per year      | 100 €per year        |
| <b>Complaints &amp; symptoms</b>                                                                                                                      | no complaints      | sensitive tooth neck |
| <b>Frequency of periodontist visits</b>                                                                                                               | none necessary     | 4 x per year         |
| <b>Which situation do you prefer?<br/>(please tick a box):</b>                                                                                        |                    |                      |

**Question 4**

| Please assume:<br>Without treatment you will loose 3 teeth within the next 10 years.<br>With treatment you can reach one of the following situations. |                    |                         |
|-------------------------------------------------------------------------------------------------------------------------------------------------------|--------------------|-------------------------|
|                                                                                                                                                       | <b>Situation A</b> | <b>Situation B</b>      |
| <b>Tooth loss within next 10 years</b>                                                                                                                | 2 teeth lost       | 1 tooth lost            |
| <b>Own costs for treatment, follow-up care and re-treatment</b>                                                                                       | 300 €per year      | 100 €per year           |
| <b>Complaints &amp; symptoms</b>                                                                                                                      | no complaints      | occasional gum bleeding |
| <b>Frequency of periodontist visits</b>                                                                                                               | 2 x per year       | none necessary          |
| <b>Which situation do you prefer?<br/>(please tick a box):</b>                                                                                        |                    |                         |

**Question 5**

| Please assume:<br>Without treatment you will loose 3 teeth within the next 10 years.<br>With treatment you can reach one of the following situations. |                      |                                 |
|-------------------------------------------------------------------------------------------------------------------------------------------------------|----------------------|---------------------------------|
|                                                                                                                                                       | Situation A          | Situation B                     |
| <b>Tooth loss within next 10 years</b>                                                                                                                | no tooth lost        | 1 tooth lost                    |
| <b>Own costs for treatment, follow-up care and re-treatment</b>                                                                                       | 500 €per year        | 0 €per year                     |
| <b>Complaints &amp; symptoms</b>                                                                                                                      | sensitive tooth neck | long teeth due to gum recession |
| <b>Frequency of periodontist visits</b>                                                                                                               | 4 x per year         | 2 x per year                    |
| <b>Which situation do you prefer?<br/>(please tick a box):</b>                                                                                        |                      |                                 |

**Question 6**

| Please assume:<br>Without treatment you will loose 3 teeth within the next 10 years.<br>With treatment you can reach one of the following situations. |                                 |                         |
|-------------------------------------------------------------------------------------------------------------------------------------------------------|---------------------------------|-------------------------|
|                                                                                                                                                       | Situation A                     | Situation B             |
| <b>Tooth loss within next 10 years</b>                                                                                                                | no tooth lost                   | no tooth lost           |
| <b>Own costs for treatment, follow-up care and re-treatment</b>                                                                                       | 300 €per year                   | 300 €per year           |
| <b>Complaints &amp; symptoms</b>                                                                                                                      | long teeth due to gum recession | occasional gum bleeding |
| <b>Frequency of periodontist visits</b>                                                                                                               | 4 x per year                    | 2 x per year            |
| <b>Which situation do you prefer?<br/>(please tick a box):</b>                                                                                        |                                 |                         |

**Question 7**

| Please assume:<br>Without treatment you will loose 3 teeth within the next 10 years.<br>With treatment you can reach one of the following situations. |                         |                      |
|-------------------------------------------------------------------------------------------------------------------------------------------------------|-------------------------|----------------------|
|                                                                                                                                                       | Situation A             | Situation B          |
| <b>Tooth loss within next 10 years</b>                                                                                                                | 2 teeth lost            | no tooth lost        |
| <b>Own costs for treatment, follow-up care and re-treatment</b>                                                                                       | 100 €per year           | 300 €per year        |
| <b>Complaints &amp; symptoms</b>                                                                                                                      | occasional gum bleeding | sensitive tooth neck |
| <b>Frequency of periodontist visits</b>                                                                                                               | 4 x per year            | 2 x per year         |
| <b>Which situation do you prefer?<br/>(please tick a box):</b>                                                                                        |                         |                      |

**Question 8**

| Please assume:<br>Without treatment you will loose 3 teeth within the next 10 years.<br>With treatment you can reach one of the following situations. |                      |                                 |
|-------------------------------------------------------------------------------------------------------------------------------------------------------|----------------------|---------------------------------|
|                                                                                                                                                       | Situation A          | Situation B                     |
| <b>Tooth loss within next 10 years</b>                                                                                                                | 1 tooth lost         | no tooth lost                   |
| <b>Own costs for treatment, follow-up care and re-treatment</b>                                                                                       | 0 €per year          | 500 €per year                   |
| <b>Complaints &amp; symptoms</b>                                                                                                                      | sensitive tooth neck | long teeth due to gum recession |
| <b>Frequency of periodontist visits</b>                                                                                                               | 2 x per year         | none necessary                  |
| <b>Which situation do you prefer?<br/>(please tick a box):</b>                                                                                        |                      |                                 |

**Question 9**

| Please assume:<br>Without treatment you will loose 3 teeth within the next 10 years.<br>With treatment you can reach one of the following situations. |                                 |                |
|-------------------------------------------------------------------------------------------------------------------------------------------------------|---------------------------------|----------------|
|                                                                                                                                                       | Situation A                     | Situation B    |
| <b>Tooth loss within next 10 years</b>                                                                                                                | no tooth lost                   | 2 teeth lost   |
| <b>Own costs for treatment, follow-up care and re-treatment</b>                                                                                       | 0 €per year                     | 500 €per year  |
| <b>Complaints &amp; symptoms</b>                                                                                                                      | long teeth due to gum recession | no complaints  |
| <b>Frequency of periodontist visits</b>                                                                                                               | 4 x per year                    | none necessary |
| <b>Which situation do you prefer?<br/>(please tick a box):</b>                                                                                        |                                 |                |

**Question 10**

| Please assume:<br>Without treatment you will loose 3 teeth within the next 10 years.<br>With treatment you can reach one of the following situations. |                                 |               |
|-------------------------------------------------------------------------------------------------------------------------------------------------------|---------------------------------|---------------|
|                                                                                                                                                       | Situation A                     | Situation B   |
| <b>Tooth loss within next 10 years</b>                                                                                                                | 2 teeth lost                    | 1 tooth lost  |
| <b>Own costs for treatment, follow-up care and re-treatment</b>                                                                                       | 100 €per year                   | 300 €per year |
| <b>Complaints &amp; symptoms</b>                                                                                                                      | long teeth due to gum recession | no complaints |
| <b>Frequency of periodontist visits</b>                                                                                                               | 2 x per year                    | 4 x per year  |
| <b>Which situation do you prefer?<br/>(please tick a box):</b>                                                                                        |                                 |               |

**Question 11**

| Please assume:<br>Without treatment you will loose 3 teeth within the next 10 years.<br>With treatment you can reach one of the following situations. |                      |               |
|-------------------------------------------------------------------------------------------------------------------------------------------------------|----------------------|---------------|
|                                                                                                                                                       | Situation A          | Situation B   |
| <b>Tooth loss within next 10 years</b>                                                                                                                | 1 tooth lost         | 2 teeth lost  |
| <b>Own costs for treatment, follow-up care and re-treatment</b>                                                                                       | 500 €per year        | 0 €per year   |
| <b>Complaints &amp; symptoms</b>                                                                                                                      | sensitive tooth neck | no complaints |
| <b>Frequency of periodontist visits</b>                                                                                                               | none necessary       | 4 x per year  |
| <b>Which situation do you prefer?<br/>(please tick a box):</b>                                                                                        |                      |               |

**Question 12**

| Please assume:<br>Without treatment you will loose 3 teeth within the next 10 years.<br>With treatment you can reach one of the following situations. |                         |                      |
|-------------------------------------------------------------------------------------------------------------------------------------------------------|-------------------------|----------------------|
|                                                                                                                                                       | Situation A             | Situation B          |
| <b>Tooth loss within next 10 years</b>                                                                                                                | 1 tooth lost            | 2 teeth lost         |
| <b>Own costs for treatment, follow-up care and re-treatment</b>                                                                                       | 500 €per year           | 0 €per year          |
| <b>Complaints &amp; symptoms</b>                                                                                                                      | occasional gum bleeding | sensitive tooth neck |
| <b>Frequency of periodontist visits</b>                                                                                                               | 2 x per year            | none necessary       |
| <b>Which situation do you prefer?<br/>(please tick a box):</b>                                                                                        |                         |                      |



**Question 13**

| <b>Please assume:<br/>Without treatment you will loose 3 teeth within the next 10 years.<br/>With treatment you can reach one of the following situations.</b> |                    |                      |
|----------------------------------------------------------------------------------------------------------------------------------------------------------------|--------------------|----------------------|
|                                                                                                                                                                | <b>Situation A</b> | <b>Situation B</b>   |
| <b>Tooth loss within next 10 years</b>                                                                                                                         | no tooth lost      | 2 teeth lost         |
| <b>Own costs for treatment, follow-up care and re-treatment</b>                                                                                                | 0 €per year        | 500 €per year        |
| <b>Complaints &amp; symptoms</b>                                                                                                                               | no complaints      | sensitive tooth neck |
| <b>Frequency of periodontist visits</b>                                                                                                                        | 2 x per year       | 2x per year          |
| <b>Which situation do you prefer?<br/>(please tick a box):</b>                                                                                                 |                    |                      |

| <b>Which aspect was most or least important in your decisions? Please mark only one aspect in each row!</b> |                                 |                                                          |                       |                                  |
|-------------------------------------------------------------------------------------------------------------|---------------------------------|----------------------------------------------------------|-----------------------|----------------------------------|
|                                                                                                             | Tooth loss within next 10 years | Own costs for treatment, follow-up care and re-treatment | Complaints & symptoms | Frequency of periodontist visits |
| <b>Most important</b>                                                                                       |                                 |                                                          |                       |                                  |
| <b>Least important</b>                                                                                      |                                 |                                                          |                       |                                  |

| <b>Which symptoms &amp; complaints do you want to avoid most? Please mark only one symptom or complaint!</b> |                         |                      |
|--------------------------------------------------------------------------------------------------------------|-------------------------|----------------------|
| long teeth due to gum recession                                                                              | occasional gum bleeding | sensitive tooth neck |
|                                                                                                              |                         |                      |

## Demographic characteristics

### 1. Please select your gender:

|        |  |
|--------|--|
| Female |  |
| Male   |  |

### 2. Please provide your age-group:

|                      |  |
|----------------------|--|
| 30 years or youngerr |  |
| 31- 40 years         |  |
| 41- 50 years         |  |
| 51- 60 years         |  |
| 61- 70 years         |  |
| 71- 80 years         |  |
| older than 80 years  |  |

### 3. When were you first diagnosed with periodontal disease?

|                      |  |
|----------------------|--|
| less than 1 year ago |  |
| 1- 2 years ago       |  |
| 3 or more years ago  |  |

### 4. Have you been treated for periodontal disease already?

|                                          |  |
|------------------------------------------|--|
| Yes                                      |  |
| No, but treatment is planned             |  |
| No, I do not want to / cannot be treated |  |

### 5. Please state any current and previous diseases:

|                         |  |
|-------------------------|--|
| no                      |  |
| Diabetes Typ 1          |  |
| Diabetes Typ 2          |  |
| Cardiovascular diseases |  |
| Other                   |  |

**6. Are you pregnant?**

|                         |  |
|-------------------------|--|
| Yes                     |  |
| No                      |  |
| Do not know / no answer |  |

**7. Do you smoke?**

|                           |  |
|---------------------------|--|
| Current smoker            |  |
| Previously smoked         |  |
| Non-smoker (never smoked) |  |

**8. Please state your type of insurance:**

|                                                                   |  |
|-------------------------------------------------------------------|--|
| Statutory Health Insurance without supplementary dental insurance |  |
| Statutory Health Insurance with supplementary dental insurance    |  |
| Private insurance                                                 |  |

**9. Please state your highest educational degree:**

|                               |  |
|-------------------------------|--|
| No degree                     |  |
| Lower secondary degree        |  |
| College                       |  |
| Vocational education          |  |
| Academic or comparable degree |  |
