# Supplementary material
Source: publisher site journal article supplement (https://www.dovepress.com/article/176067)
Supplement: Supplementary file 5 [file get_supplementary_file.php]

**Patient preferences subgroup: Females (N=155)**

| Attributes and Levels                                                    | Coefficient <sup>a</sup><br>(95% CI) | Standard deviation<br>(p-value of SD) | p-value |
|--------------------------------------------------------------------------|--------------------------------------|---------------------------------------|---------|
| <b>Tooth loss within next 10 years</b>                                   |                                      |                                       |         |
| No tooth loss (reference)                                                |                                      |                                       |         |
| 1 tooth lost                                                             | -1.873<br>(-2.240; -1.507)           | 0.029<br>(0.987)                      | <0.001  |
| 2 teeth lost                                                             | -5.014<br>(-5.963;-4.065)            | 2.0133<br>(<0.0001)                   | <0.001  |
| <b>Own costs for treatment, follow-up care and re-treatment per year</b> |                                      |                                       |         |
| per 1 € <sup>b</sup>                                                     | -0.007<br>(-0.003; -0.027)           | 0.303<br>(<0.001)                     | <0.001  |
| <b>Complaints &amp; symptoms</b>                                         |                                      |                                       |         |
| no complaints (reference)                                                |                                      |                                       |         |
| occasional gum bleeding                                                  | -0.193<br>(-0.231; 0.618)            | 0.5953<br>(0.038)                     | 0.372   |
| “long teeth” due to gum recession                                        | -1.416<br>(-1.879; -0.952)           | 1.0506<br>(<0.001)                    | <0.001  |
| sensitive tooth necks                                                    | -0.449<br>(-0.835; -0.063)           | 0.4336<br>(0.227)                     | 0.022   |
| <b>Frequency of periodontist visits</b>                                  |                                      |                                       |         |
| none necessary (reference)                                               |                                      |                                       |         |
| 2 x per year                                                             | 0.311<br>(0.011; 0.612)              | 0.063<br>(0.946)                      | 0.042   |
| 4 x per year                                                             | -0.126<br>(-0.174; 0.426)            | 0.486<br>(0.052)                      | 0.411   |

<sup>a</sup>Expected values of random coefficients

<sup>b</sup>lognormal coefficient was transformed into expected value of median by ( $e^{\mu}$ ). The standard deviation

was calculated using the following formula:  $\sqrt{e^{2\mu+\sigma^2} * (e^{\sigma^2} - 1)}$

Number of observations. ie answered choice sets: 1848; missing answers for choice sets: 12;  
SD= Standard deviation; CI=Confidence Interval; Pseudo-R<sup>2</sup>: 0.4549, log likelihood: -698.24, Akaike  
Information Criterion: 1428.5

**Patient preferences subgroup: Males (N=104)**

| Attributes and Levels                                                    | Coefficient <sup>a</sup><br>(95% CI) | Standard deviation<br>(p-value of SD) | p-value |
|--------------------------------------------------------------------------|--------------------------------------|---------------------------------------|---------|
| <b>Tooth loss within next 10 years</b>                                   |                                      |                                       |         |
| No tooth loss (reference)                                                |                                      |                                       |         |
| 1 tooth lost                                                             | -2.074<br>(-2.643; -1.506)           | 0.018<br>(0.989)                      | <0.001  |
| 2 teeth lost                                                             | -4.522<br>(-5.166; -3.878)           | 0.2818<br>(<0.001)                    | <0.001  |
| <b>Own costs for treatment, follow-up care and re-treatment per year</b> |                                      |                                       |         |
| per 1 € <sup>b</sup>                                                     | -0.0095<br>(-0.001; -0.013)          | 0.204<br>(<0.001)                     | <0.001  |
| <b>Complaints &amp; symptoms</b>                                         |                                      |                                       |         |
| no complaints (reference)                                                |                                      |                                       |         |
| occasional gum bleeding                                                  | -0.005<br>(-0.338; 0.329)            | 0.258<br>(0.031)                      | 0.979   |
| “long teeth” due to gum recession                                        | -1.356<br>(-1.683; -1.030)           | 0.200<br>(<0.001)                     | <0.001  |
| sensitive tooth necks                                                    | -0.551<br>(-0.853; -0.250)           | 1.371<br>(0.988)                      | 0.0003  |
| <b>Frequency of periodontist visits</b>                                  |                                      |                                       |         |
| none necessary (reference)                                               |                                      |                                       |         |
| 2 x per year                                                             | 0.253<br>(-0.015; 0.492)             | 0.478<br>(0.840)                      | 0.037   |
| 4 x per year                                                             | -0.008<br>(-0.257; 0.241)            | 0.230<br>(0.016)                      | 0.949   |

<sup>a</sup>Expected values of random coefficients

<sup>b</sup>lognormal coefficient was transformed into expected value of median by  $(\exp(\mu))$ . The standard

deviation was calculated using the following formula:  $\sqrt{\exp^{2\mu+\sigma^2} * (\exp^{\sigma^2} - 1)}$

Number of observations. i.e. answered choice sets: 1240; missing answers for choice sets: 8;  
SD= Standard deviation; CI=Confidence Interval; Pseudo-R<sup>2</sup>: 0.4335, log likelihood: -486.93, Akaike  
Information Criterion: 1005.9

**Patient preferences subgroup: Patients 51 years and older (N=181)**

| Attributes and Levels                                                    | Coefficient <sup>a</sup><br>(95% CI) | Standard deviation<br>(p-value of SD) | p-value |
|--------------------------------------------------------------------------|--------------------------------------|---------------------------------------|---------|
| <b>Tooth loss within next 10 years</b>                                   |                                      |                                       |         |
| No tooth loss (reference)                                                |                                      |                                       |         |
| 1 tooth lost                                                             | -1.762<br>(-2.051; -1.473)           | 1.729<br>(0.988)                      | <0.001  |
| 2 teeth lost                                                             | -4.522<br>(-5.166; -3.878)           | 0.2818<br>(<0.001)                    | <0.001  |
| <b>Own costs for treatment, follow-up care and re-treatment per year</b> |                                      |                                       |         |
| per 1 € <sup>b</sup>                                                     | -0.008<br>(-0.003; -0.024)           | 0.326<br>(<0.001)                     | <0.001  |
| <b>Complaints &amp; symptoms</b>                                         |                                      |                                       |         |
| no complaints (reference)                                                |                                      |                                       |         |
| occasional gum bleeding                                                  | -0.005<br>(-0.338; 0.329)            | 0.258<br>(0.031)                      | 0.979   |
| “long teeth” due to gum recession                                        | -1.356<br>(-1.683; -1.030)           | 0.200<br>(0.0002)                     | <0.001  |
| sensitive tooth necks                                                    | -0.551<br>(-0.853; -0.250)           | 1.371<br>(0.988)                      | <0.001  |
| <b>Frequency of periodontist visits</b>                                  |                                      |                                       |         |
| none necessary (reference)                                               |                                      |                                       |         |
| 2 x per year                                                             | 0.253<br>(-0.015; 0.492)             | 0.478<br>(0.840)                      | 0.037   |
| 4 x per year                                                             | -0.008<br>(-0.257; 0.241)            | 0.230<br>(0.016)                      | 0.949   |

<sup>a</sup>Expected values of random coefficients

<sup>b</sup>lognormal coefficient was transformed into expected value of median by (exp(μ)). The standard

deviation was calculated using the following formula:  $\sqrt{\exp^{2\mu+\sigma^2} * (\exp^{\sigma^2} - 1)}$

Number of observations. i.e. answered choice sets: 2157; missing answers for choice sets: 15;  
SD= Standard deviation; CI=Confidence Interval; Pseudo-R<sup>2</sup>: 0.4175, log likelihood: -870.96, Akaike  
Information Criterion: 1773.9

**Patient preferences subgroup: Patients 50 years or younger (N=78)**

| Attributes and Levels                                                    | Coefficient <sup>a</sup><br>(95% CI) | Standard deviation<br>(p-value of SD) | p-value |
|--------------------------------------------------------------------------|--------------------------------------|---------------------------------------|---------|
| <b>Tooth loss within next 10 years</b>                                   |                                      |                                       |         |
| No tooth loss (reference)                                                |                                      |                                       |         |
| 1 tooth lost                                                             | -2.796<br>(-3.816; -1.777)           | 1.922<br>(0.963)                      | <0.001  |
| 2 teeth lost                                                             | -7.404<br>(-10.066; -4.742)          | 1.352<br>(0.028)                      | <0.001  |
| <b>Own costs for treatment, follow-up care and re-treatment per year</b> |                                      |                                       |         |
| per 1 € <sup>b</sup>                                                     | -0.008<br>(-0.001; -0.063)           | 0.184<br>(<0.002)                     | <0.001  |
| <b>Complaints &amp; symptoms</b>                                         |                                      |                                       |         |
| no complaints (reference)                                                |                                      |                                       |         |
| occasional gum bleeding                                                  | -0.311<br>(-1.330; 0.707)            | 1.485<br>(0.910)                      | 0.549   |
| “long teeth” due to gum recession                                        | -2.387<br>(-3.889; -0.886)           | 0.363<br>(0.001)                      | 0.002   |
| sensitive tooth necks                                                    | -1.262<br>(-2.200; -0.323)           | 0.569<br>(0.019)                      | 0.008   |
| <b>Frequency of periodontist visits</b>                                  |                                      |                                       |         |
| none necessary (reference)                                               |                                      |                                       |         |
| 2 x per year                                                             | -0.027<br>(-0.601; 0.547)            | 3.125<br>(0.988)                      | 0.927   |
| 4 x per year                                                             | -0.740<br>(-0.749; 0.601)            | 0.4921<br>(0.292)                     | 0.830   |

<sup>a</sup>Expected values of random coefficients

<sup>b</sup>lognormal coefficient was transformed into expected value of median by  $(\exp(\mu))$ . The standard

deviation was calculated using the following formula:  $\sqrt{\exp^{2\mu+\sigma^2} * (\exp^{\sigma^2} - 1)}$

Number of observations. i.e. answered choice sets: 931; missing answers for choice sets: 5;

SD= Standard deviation; CI=Confidence Interval; Pseudo-R<sup>2</sup>: 0.5143, log likelihood: -313.41, Akaike Information Criterion: 658.8

**Patient preferences subgroup: Patients with academic or comparable education (N=135)**

| Attributes and Levels                                                    | Coefficient <sup>a</sup><br>(95% CI) | Standard deviation<br>(p-value of SD) | p-value |
|--------------------------------------------------------------------------|--------------------------------------|---------------------------------------|---------|
| <b>Tooth loss within next 10 years</b>                                   |                                      |                                       |         |
| No tooth loss (reference)                                                |                                      |                                       |         |
| 1 tooth lost                                                             | -2.300<br>(-2.841; -1.760)           | 0.673<br>(0.765)                      | <0.001  |
| 2 teeth lost                                                             | -6.153<br>(-7.503; -4.803)           | 0.612<br>(0.001)                      | <0.001  |
| <b>Own costs for treatment, follow-up care and re-treatment per year</b> |                                      |                                       |         |
| per 1 € <sup>b</sup>                                                     | -0.0045<br>(-0.0013; -0.0154)        | 0.074<br>(<0.0001)                    | <0.001  |
| <b>Complaints &amp; symptoms</b>                                         |                                      |                                       |         |
| no complaints (reference)                                                |                                      |                                       |         |
| occasional gum bleeding                                                  | -0.161<br>(-0.697; 0.376)            | 1.229<br>(0.911)                      | 0.557   |
| “long teeth” due to gum recession                                        | -1.673<br>(-2.251; -1.095)           | 0.291<br>(0.024)                      | <0.001  |
| sensitive tooth necks                                                    | -0.862<br>(-1.38; -0.344)            | 3.143<br>(0.997)                      | 0.001   |
| <b>Frequency of periodontist visits</b>                                  |                                      |                                       |         |
| none necessary (reference)                                               |                                      |                                       |         |
| 2 x per year                                                             | 0.041<br>(-3.063; 3.146)             | 1.584<br>(0.979)                      | 0.629   |
| 4 x per year                                                             | -0.349<br>(-0.700; 0.001)            | 0.478<br>(0.304)                      | 0.051   |

<sup>a</sup>Expected values of random coefficients

<sup>b</sup>lognormal coefficient was transformed into expected value of median by  $(\exp(\mu))$ . The standard

deviation was calculated using the following formula:  $\sqrt{\exp^{2\mu+\sigma^2} * (\exp^{\sigma^2} - 1)}$

Number of observations. i.e. answered choice sets: 1612; missing answers for choice sets: 8;  
SD= Standard deviation; CI=Confidence Interval; Pseudo-R<sup>2</sup>: 0.5350, log likelihood: -519.54, Akaike  
Information Criterion: 1071.1

**Patient preferences subgroup: Patients with non-academic education (n=122)**

| Attributes and Levels                                                    | Coefficient <sup>a</sup><br>(95% CI) | Standard deviation<br>(p-value of SD) | p-value |
|--------------------------------------------------------------------------|--------------------------------------|---------------------------------------|---------|
| <b>Tooth loss within next 10 years</b>                                   |                                      |                                       |         |
| No tooth loss (reference)                                                |                                      |                                       |         |
| 1 tooth lost                                                             | -1.649<br>(-2.032; -1.266)           | 1.548<br>(0.995)                      | <0.001  |
| 2 teeth lost                                                             | -4.022<br>(-4.858; -3.187)           | 0.335<br>(<0.001)                     | <0.001  |
| <b>Own costs for treatment, follow-up care and re-treatment per year</b> |                                      |                                       |         |
| per 1 € <sup>b</sup>                                                     | -0.007<br>(-0.002; -0.024)           | 0.152<br>(<0.001)                     | <0.001  |
| <b>Complaints &amp; symptoms</b>                                         |                                      |                                       |         |
| no complaints (reference)                                                |                                      |                                       |         |
| occasional gum bleeding                                                  | -0.078<br>(-0.463; 0.307)            | 0.429<br>(0.432)                      | 0.691   |
| “long teeth” due to gum recession                                        | -1.490<br>(-1.944; -1.037)           | 0.244<br>(0.001)                      | <0.001  |
| sensitive tooth necks                                                    | -0.535<br>(-0.925; -0.146)           | 0.250<br>(0.002)                      | 0.007   |
| <b>Frequency of periodontist visits</b>                                  |                                      |                                       |         |
| none necessary (reference)                                               |                                      |                                       |         |
| 2 x per year                                                             | 0.253<br>(-0.088; 0.593)             | 1.456<br>(0.995)                      | 0.145   |
| 4 x per year                                                             | 0.159<br>(-0.135; 0.452)             | 0.261<br>(0.051)                      | 0.289   |

<sup>a</sup>Expected values of random coefficients

<sup>b</sup>lognormal coefficient was transformed into expected value of median by  $(\exp(\mu))$ . The standard

deviation was calculated using the following formula:  $\sqrt{\exp^{2\mu+\sigma^2} * (\exp^{\sigma^2} - 1)}$

Number of observations. i.e. answered choice sets: 1656; missing answers for choice sets: 10;  
SD= Standard deviation; CI=Confidence Interval; Pseudo-R<sup>2</sup>: 0.3633, log likelihood: -641.72, Akaike  
Information Criterion: 1315.4

**Patient preferences subgroup: Patients diagnosed 3 or more years ago (N=182)**

| Attributes and Levels                                                    | Coefficient <sup>a</sup><br>(95% CI) | Standard deviation<br>(p-value of SD) | p-value |
|--------------------------------------------------------------------------|--------------------------------------|---------------------------------------|---------|
| <b>Tooth loss within next 10 years</b>                                   |                                      |                                       |         |
| No tooth loss (reference)                                                |                                      |                                       |         |
| 1 tooth lost                                                             | -1.881<br>(-2.208; -1.555)           | 2.791<br>(0.999)                      | <0.001  |
| 2 teeth lost                                                             | -4.749<br>(-5.484; -4.0134)          | 0.315<br>(<0.001)                     | <0.001  |
| <b>Own costs for treatment, follow-up care and re-treatment per year</b> |                                      |                                       |         |
| per 1 € <sup>b</sup>                                                     | -0.013<br>(-0.006; -0.030)           | 0.517<br>(<0.001)                     | <0.001  |
| <b>Complaints &amp; symptoms</b>                                         |                                      |                                       |         |
| no complaints (reference)                                                |                                      |                                       |         |
| occasional gum bleeding                                                  | -0.016<br>(-0.384; 0.351)            | 0.243<br>(0.014)                      | 0.931   |
| “long teeth” due to gum recession                                        | -1.316<br>(-1.674; -0.959)           | 0.219<br>(0.002)                      | <0.001  |
| sensitive tooth necks                                                    | -0.629<br>(-0.939; -0.319)           | 0.398<br>(0.517)                      | 0.001   |
| <b>Frequency of periodontist visits</b>                                  |                                      |                                       |         |
| none necessary (reference)                                               |                                      |                                       |         |
| 2 x per year                                                             | 0.240<br>(-0.037; 0.517)             | 2.147<br>(0.995)                      | 0.089   |
| 4 x per year                                                             | 0.048<br>(-0.201; 0.300)             | 0.219<br>(0.016)                      | 0.706   |

<sup>a</sup>Expected values of random coefficients

<sup>b</sup>lognormal coefficient was transformed into expected value of median by  $(\exp(\mu))$ . The standard

deviation was calculated using the following formula:  $\sqrt{\exp^{2\mu+\sigma^2} * (\exp^{\sigma^2} - 1)}$

Number of observations. i.e. answered choice sets: 2169; missing answers for choice sets: 15;

SD= Standard deviation; CI=Confidence Interval; Pseudo-R<sup>2</sup>: 0.427, log likelihood: -861.57, Akaike Information Criterion: 1755.1

**Patient preferences subgroup: Patients diagnosed less than 3 years ago (N=70)**

| Attributes and Levels                                                    | Coefficient <sup>a</sup><br>(95% CI) | Standard deviation<br>(p-value of SD) | p-value |
|--------------------------------------------------------------------------|--------------------------------------|---------------------------------------|---------|
| <b>Tooth loss within next 10 years</b>                                   |                                      |                                       |         |
| No tooth loss (reference)                                                |                                      |                                       |         |
| 1 tooth lost                                                             | -2.354<br>(-3.432; -1.275)           | 2.288<br>(0.939)                      | <0.001  |
| 2 teeth lost                                                             | -6.078<br>(-7.967; -4.189)           | 0.801<br>(0.005)                      | <0.001  |
| <b>Own costs for treatment, follow-up care and re-treatment per year</b> |                                      |                                       |         |
| per 1 € <sup>b</sup>                                                     | -0.015<br>(-0.003; -0.079)           | 0.818<br>(<0.001)                     | <0.001  |
| <b>Complaints &amp; symptoms</b>                                         |                                      |                                       |         |
| no complaints (reference)                                                |                                      |                                       |         |
| occasional gum bleeding                                                  | -0.193<br>(-1.018; 0.632)            | 1.136<br>(0.743)                      | 0.646   |
| “long teeth” due to gum recession                                        | -2.081<br>(-3.205; -0.957)           | 0.422<br>(0.001)                      | <0.001  |
| sensitive tooth necks                                                    | -0.693<br>(-1.371; -0.015)           | 0.586<br>(0.082)                      | 0.045   |
| <b>Frequency of periodontist visits</b>                                  |                                      |                                       |         |
| none necessary (reference)                                               |                                      |                                       |         |
| 2 x per year                                                             | 0.288<br>(-0.143; 0.720)             | 4.418<br>(0.976)                      | 0.190   |
| 4 x per year                                                             | -0.211<br>(-0.838; 0.417)            | 1.017<br>(0.717)                      | 0.511   |

<sup>a</sup>Expected values of random coefficients

<sup>b</sup>lognormal coefficient was transformed into expected value of median by  $(\exp(\mu))$ . The standard

deviation was calculated using the following formula:  $\sqrt{\exp^{2\mu+\sigma^2} * (\exp^{\sigma^2} - 1)}$

Number of observations. i.e. answered choice sets: 836; missing answers for choice sets: 4;

SD= Standard deviation; CI=Confidence Interval; Pseudo-R<sup>2</sup>: 0.4921, log likelihood: -294.31, Akaike Information Criterion: 620.6
